# Supplementary material for: Platinum Black/Gold Nanoparticles/Polyaniline Modified Electrochemical Microneedle Sensors for Continuous In Vivo Monitoring of pH Value
Source: MDPI journal article supplement (doi:10.3390/polym15132796), 2023-06-23
Supplement: s1 [file s1]

# Supporting Information

## **Platinum black/gold nanoparticles/polyaniline modified electrochemical microneedle sensors for continuous in vivo monitoring of pH value**

Tao Ming<sup>a</sup>, Tingting Lan<sup>a</sup>, Mingxing Yu<sup>a</sup>, Hong Wang<sup>b</sup>, Juan Deng<sup>b</sup>, Deling Kong<sup>a</sup>, Shuang Yang<sup>a\*</sup>,  
Zhongyang Shen<sup>a\*</sup>

<sup>a</sup> Research Institute of Transplant Medicine, Tianjin First Central Hospital, Nankai University, Tianjin 300190, China

<sup>b</sup> Institute of Biomedical Engineering, Chinese Academy of Medical Sciences & Peking Union Medical College, Tianjin 300192,  
China

\* Correspondence: yangshuang@nankai.edu.cn (S. Yang), zhongyangshen@nankai.edu.cn (Z. Shen).

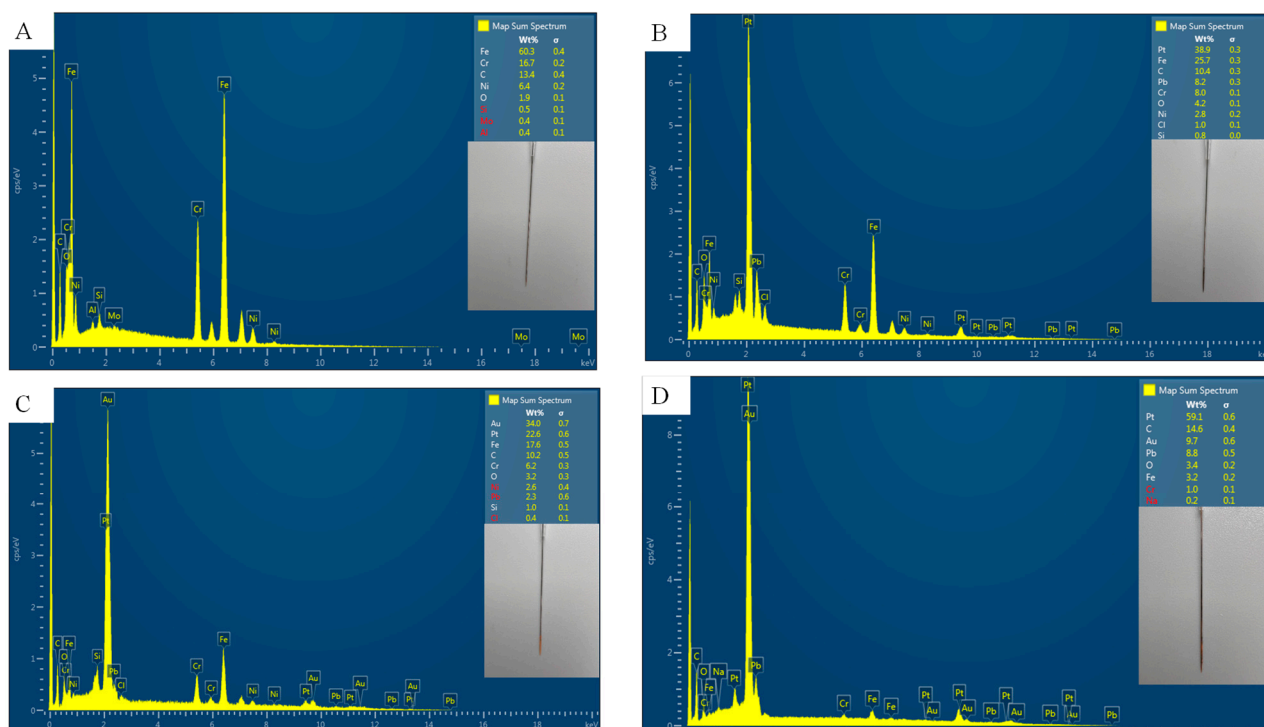

**Fig. S1** The physical image and the EDS results of the electrode: (A) Bare AN; (B) Ptb/AN; (C) AuNPs/Ptb/AN; (D) PANI/ AuNPs/Ptb/AN;

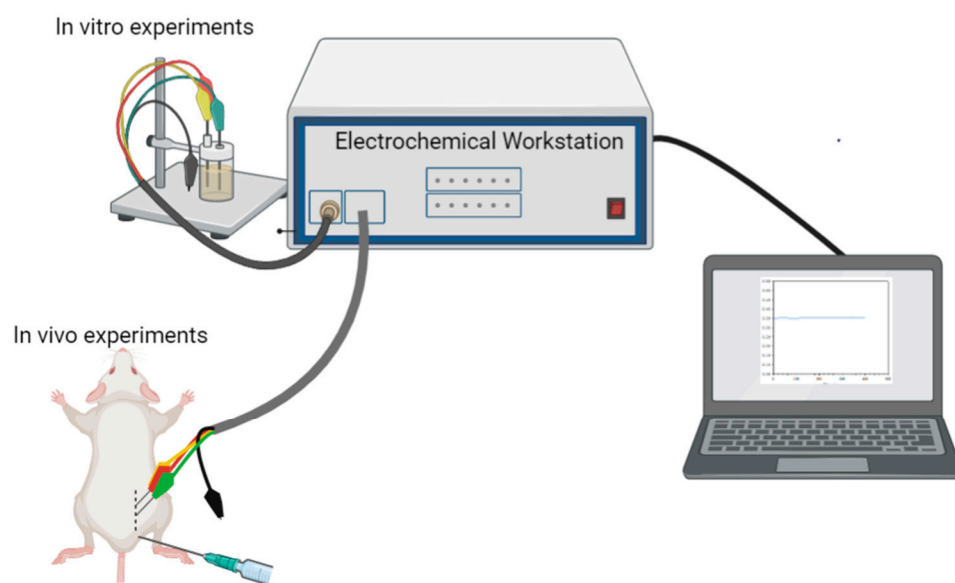

15

**Fig. S2** Schematic of the measurement setup

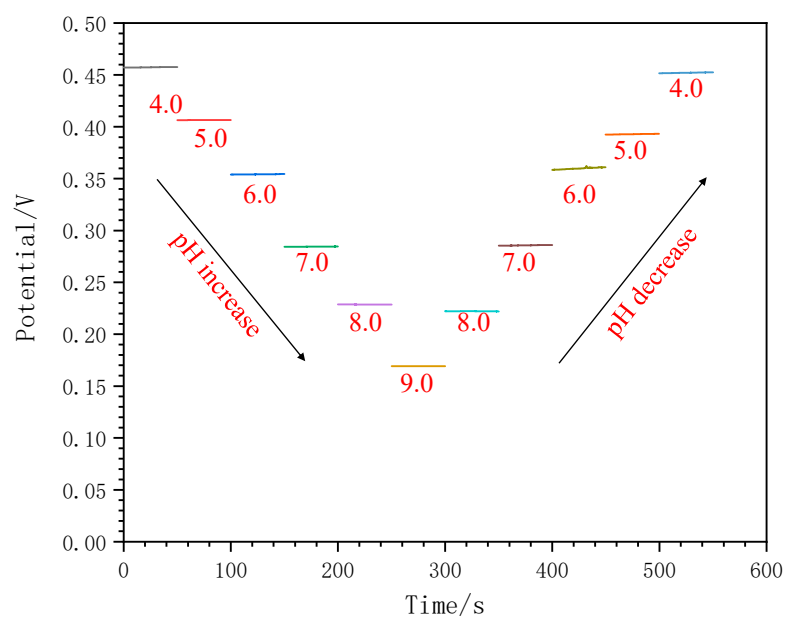

**Fig. S3** The real-time OPCT responses in various pH buffer solutions.

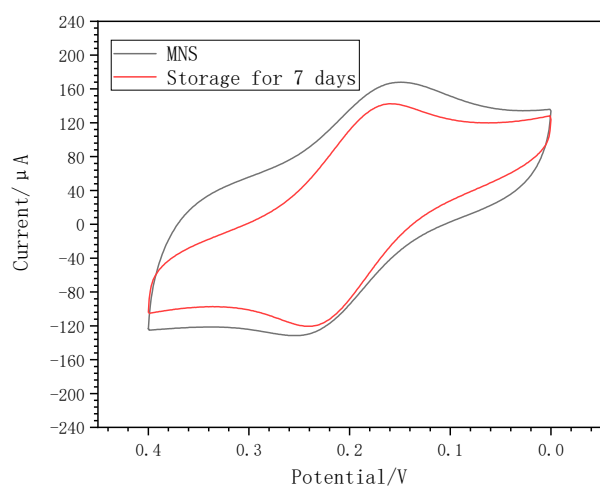

A

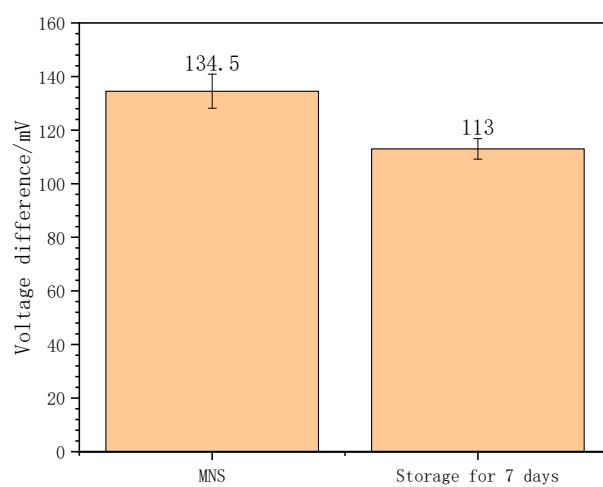

B

12

**Fig. S4** The stability of the MNS. (A) The CV response of the proposed MNS and MNS after storing in standard serum for seven days; (B) The change in detection capability of the sensor;
